# Supplementary material for: Дух мира вместо хаоса и вакуума (физическая структура Вселенной)
Source: Royal Society of Chemistry journal article supplement (doi:10.1039/d2dt02763a), 2004-01-01
Supplement: d2dt02763a1.pdf [file d2dt02763a1.pdf]

*Electronic Supplementary Information*

Uranium oxide hydrate frameworks with Er(III) or Y(III) ions:

Revealing structural insights leading to the low symmetry

Timothy A. Ablott, Kimbal T. Lu, Robert D. Aughterson, and Yingjie Zhang\*

*Australian Nuclear Science and Technology Organisation, Locked Bag 2001, Kirrawee DC,  
NSW 2232, Australia.*

\* Corresponding author: *Email:* [yzx@ansto.gov.au](mailto:yzx@ansto.gov.au) (Y. Zhang)

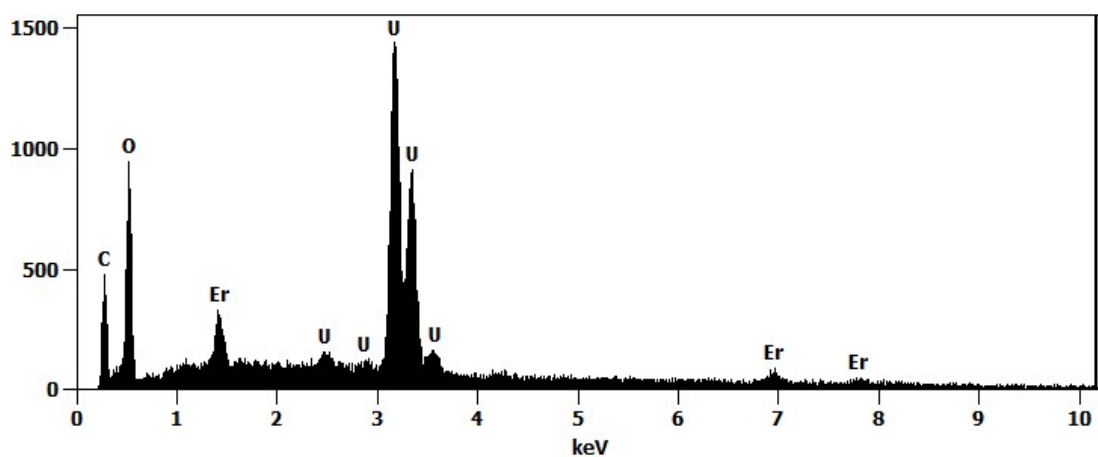

**Figure S1.** Full EDS spectrum of UOF-Er.

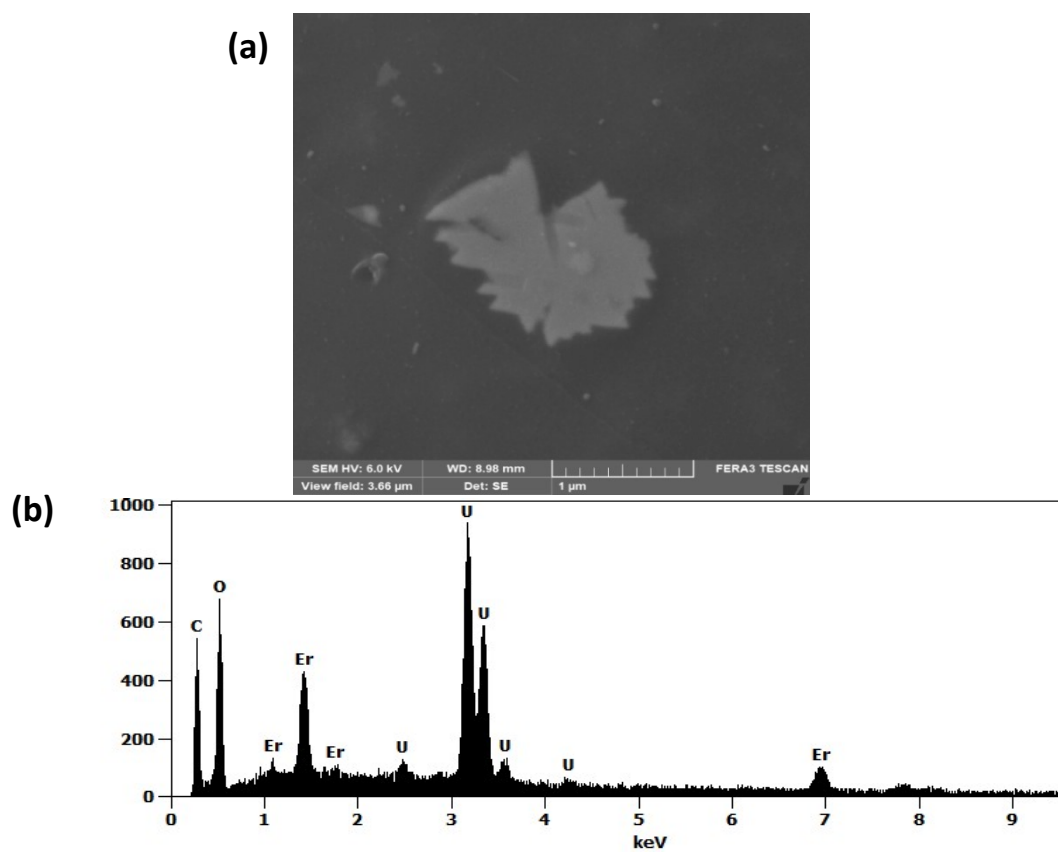

**Figure S2.** SEM-EDS of the minor phase isolated from the synthesis of UOF-Er: a secondary SEM image (a) and the corresponding EDS spectrum (b) confirming the presence of both U and Er in a  $\sim 2.5:1$  atomic ratio.

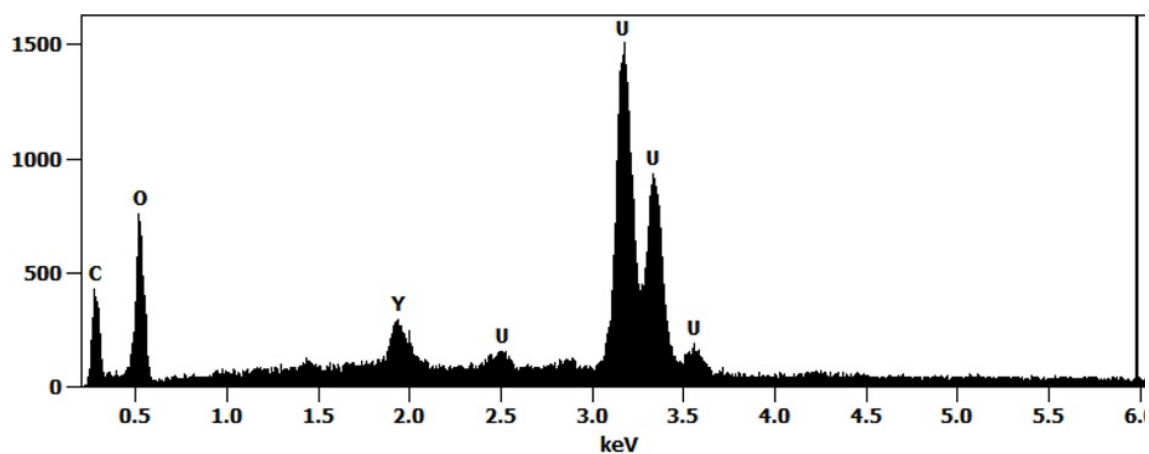

Figure S3. Full EDS spectrum of UOF-Y.

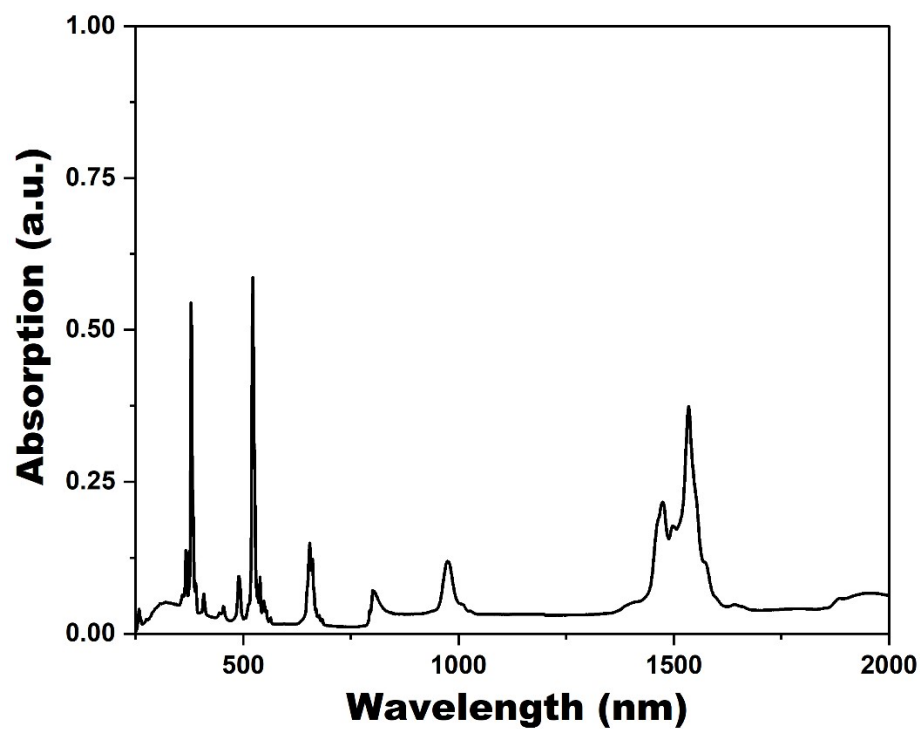

Figure S4. An absorption spectrum of  $\text{Er}(\text{NO}_3)_3 \cdot 6\text{H}_2\text{O}$ .

**Table S1.** SEM-EDS results and metal ratios for both **UOF-Er** and **UOF-Y**, and minor phases.

| Sample                      | Atom % U | Atom % Er | Atom % Y | U:Er/Y ratio |
|-----------------------------|----------|-----------|----------|--------------|
| <b>UOF-Er</b>               | 17.1     | 2.99      | -        | 5.7          |
| <b>UOF-Er - minor phase</b> | 13.06    | 5.45      | -        | 2.4          |
| <b>UOF-Y</b>                | 21.98    | -         | 3.77     | 5.8          |
| <b>UOF-Y - minor phase</b>  | 14.19    | -         | 4.8      | 3.0          |

**Table S2.** Selected bond lengths (Å) and angles (°) for compounds **UOF-Er** and **UOF-Y**.

| <b>UOF-Er</b>        |           |                         |           |                      |           |                     |           |
|----------------------|-----------|-------------------------|-----------|----------------------|-----------|---------------------|-----------|
| U1–O1                | 2.18(3)   | U2–O5 <sup>3</sup>      | 2.40(3)   | U3–O2                | 2.33(3)   | U4–O1 <sup>6</sup>  | 2.36(3)   |
| U1–O2                | 2.15(3)   | U2–O6                   | 1.74(3)   | U3–O2 <sup>2</sup>   | 2.26(3)   | U4–O10              | 2.24(4)   |
| U1–O3                | 1.85(3)   | U2–O7                   | 1.72(3)   | U3–O4                | 2.30(4)   | U4–O11              | 1.90(3)   |
| U1–O4                | 2.17(3)   | U2–O8                   | 2.53(3)   | U3–O8                | 1.97(3)   | U4–O12 <sup>4</sup> | 2.28(3)   |
| U1–O5                | 1.92(4)   | U2–O8 <sup>3</sup>      | 2.39(3)   | U3–O9                | 1.86(4)   | U4–O12              | 2.28(3)   |
| U1–O12 <sup>2</sup>  | 2.21(3)   | U2–O10                  | 2.29(3)   | U3–O10               | 2.24(3)   | U4–O13              | 2.40(3)   |
| O3=U1=O5             | 176.0(15) | U2–O11                  | 2.43(3)   | U3–O18               | 2.36(3)   | U4–O14              | 1.85(3)   |
|                      |           | O6=U2=O7                | 178.2(16) | O8=U3=O9             | 175.0(14) | O11=U4=O14          | 174.5(15) |
| U5–O1 <sup>1</sup>   | 2.34(3)   | U6–O13 <sup>5</sup>     | 2.08(4)   | Er1–O14              | 2.22(3)   |                     |           |
| U5–O4                | 2.30(3)   | U6–O13                  | 2.08(4)   | Er1–O15 <sup>5</sup> | 2.55(3)   |                     |           |
| U5–O13 <sup>5</sup>  | 2.43(3)   | U6–O18 <sup>5</sup>     | 2.05(3)   | Er1–O16 <sup>7</sup> | 2.37(3)   |                     |           |
| U5–O15               | 1.84(3)   | U6–O18                  | 2.05(3)   | Er1–O19              | 2.37(4)   |                     |           |
| U5–O16               | 1.84(3)   | U6–O19 <sup>5</sup>     | 2.14(4)   | Er1–O20              | 2.33(4)   |                     |           |
| U5–O17               | 2.39(7)   | U6–O19                  | 2.14(4)   | Er1–O21              | 2.44(4)   |                     |           |
| U5–O17 <sup>1</sup>  | 2.17(7)   | O13–U6–O13 <sup>6</sup> | 180.0     | Er1–O22              | 2.36(4)   |                     |           |
| U5–O18               | 2.37(3)   |                         |           | Er1–O23              | 2.25(3)   |                     |           |
| O15=U5=O16           | 175.0(14) |                         |           |                      |           |                     |           |
| <b>UOF-Y</b>         |           |                         |           |                      |           |                     |           |
| U1–O1                | 2.192(14) | U2–O5                   | 2.358(13) | U3–O2 <sup>1</sup>   | 2.295(13) | U4–O1 <sup>2</sup>  | 2.341(13) |
| U1–O2                | 2.165(14) | U2–O6                   | 1.760(14) | U3–O2 <sup>5</sup>   | 2.255(14) | U4–O10              | 2.210(13) |
| U1–O3                | 1.821(14) | U2–O7                   | 1.785(14) | U3–O4 <sup>1</sup>   | 2.285(15) | U4–O11              | 1.884(13) |
| U1–O4                | 2.186(14) | U2–O8                   | 2.481(13) | U3–O8                | 2.001(13) | U4–O12 <sup>6</sup> | 2.244(14) |
| U1–O5                | 1.939(14) | U2–O8 <sup>1</sup>      | 2.369(13) | U3–O9                | 1.843(13) | U4–O12              | 2.275(13) |
| U1–O12 <sup>3</sup>  | 2.234(13) | U2–O10                  | 2.318(13) | U3–O10               | 2.224(13) | U4–O13              | 2.399(14) |
| O3=U1=O5             | 176.5(6)  | U2–O11                  | 2.429(13) | U3–O18 <sup>4</sup>  | 2.378(13) | U4–O14              | 1.830(14) |
|                      |           | O6=U2=O7                | 178.8(6)  | O9=U3=O8             | 173.3(6)  | O14=U4=O11          | 176.6(6)  |
| U5–O1 <sup>2</sup>   | 2.315(14) | U6–O13 <sup>4</sup>     | 2.063(14) | Y1–O14               | 2.260(14) |                     |           |
| U5–O4 <sup>9</sup>   | 2.283(13) | U6–O13                  | 2.063(14) | Y1–O15               | 2.539(13) |                     |           |
| U5–O13               | 2.436(13) | U6–O18 <sup>4</sup>     | 2.038(13) | Y1–O16 <sup>5</sup>  | 2.348(13) |                     |           |
| U5–O15               | 1.829(13) | U6–O18                  | 2.038(13) | Y1–O19               | 2.277(14) |                     |           |
| U5–O16               | 1.851(13) | U6–O19 <sup>4</sup>     | 2.200(13) | Y1–O20               | 2.336(14) |                     |           |
| U5–O17               | 2.21(3)   | U6–O19                  | 2.200(13) | Y1–O21               | 2.429(14) |                     |           |
| U5–O17 <sup>10</sup> | 2.27(3)   | O13–U6–O13 <sup>4</sup> | 180.0(11) | Y1–O22               | 2.285(13) |                     |           |
| U5–O18               | 2.366(14) |                         |           | Y1–O23               | 2.293(13) |                     |           |
| O15=U5=O16           | 174.0(6)  |                         |           |                      |           |                     |           |

<sup>1</sup>1-X,1-Y,1-Z; <sup>2</sup>2-X,2-Y,1-Z; <sup>3</sup>1-X,2-Y,1-Z; <sup>4</sup>2-X,2-Y,2-Z; <sup>5</sup>1-X,1-Y,1-Z; <sup>6</sup>+X,+Y,1+Z; <sup>7</sup>2-X,1-Y,1-Z

**Table S3.** BVS calculations for **UOF-Er**.

|             | <b>U1</b>   | <b>U2</b>   | <b>U3</b>   | <b>U4</b>   | <b>U5</b>   | <b>U6</b>   | <b>Er</b>   |                                |
|-------------|-------------|-------------|-------------|-------------|-------------|-------------|-------------|--------------------------------|
| <b>Occ</b>  | <b>1</b>    |                                |
| <b>Sym</b>  | <b>1</b>    | <b>1</b>    | <b>1</b>    | <b>1</b>    | <b>1</b>    | <b>2</b>    | <b>1</b>    |                                |
| <b>CN #</b> | <b>6</b>    | <b>7</b>    | <b>7</b>    | <b>7</b>    | <b>7</b>    | <b>6</b>    | <b>8</b>    | <b>Σ</b>                       |
| O1          | 0.78        |             |             | 0.56        | 0.57        |             |             | <b>1.92</b>                    |
| O2          | 0.81        |             | 0.58 0.67   |             |             |             |             | <b>2.06</b>                    |
| O3          | 1.44        |             |             |             |             |             |             | <b>1.44</b>                    |
| O4          | 0.80        |             | 0.62        |             | 0.62        |             |             | <b>2.03</b>                    |
| O5          | 1.31        | 0.51        |             |             |             |             |             | <b>1.82</b>                    |
| O6          |             | 1.86        |             |             |             |             |             | <b>1.86</b>                    |
| O7          |             | 1.89        |             |             |             |             |             | <b>1.89</b>                    |
| O8          |             | 0.40        | 0.52 1.17   |             |             |             |             | <b>2.09</b>                    |
| O9          |             |             | 1.50        |             |             |             |             | <b>1.50</b>                    |
| O10         |             | 0.63        | 0.68        | 0.69        |             |             |             | <b>2.01</b>                    |
| O11         |             | 0.48        |             | 1.34        |             |             |             | <b>1.82</b>                    |
| O12         | 0.75        |             |             | 0.63 0.64   |             |             |             | <b>2.02</b>                    |
| O13         |             |             |             | 0.52        | 0.48        | 0.95 0.95   |             | <b>1.95</b>                    |
| O14         |             |             |             | 1.47        |             |             | 0.53        | <b>2.00</b>                    |
| O15         |             |             |             |             | 1.50        |             | 0.22        | <b>1.73</b>                    |
| O16         |             |             |             |             | 1.50        |             | 0.36        | <b>1.86</b>                    |
| O17         |             |             |             |             | 0.80        | 0.52        |             | <b>1.32</b> (OH)               |
| O18         |             |             | 0.55        |             | 0.54        | 1.00 1.00   |             | <b>2.09</b>                    |
| O19         |             |             |             |             |             | 0.84 0.84   | 0.35        | <b>1.19</b> (OH)               |
| O20         |             |             |             |             |             |             | 0.40        | <b>0.40</b> (H <sub>2</sub> O) |
| O21         |             |             |             |             |             |             | 0.30        | <b>0.30</b> (H <sub>2</sub> O) |
| O22         |             |             |             |             |             |             | 0.37        | <b>0.37</b> (H <sub>2</sub> O) |
| O23         |             |             |             |             |             |             | 0.50        | <b>0.50</b> (H <sub>2</sub> O) |
| <b>Σ</b>    | <b>5.89</b> | <b>6.29</b> | <b>5.78</b> | <b>5.86</b> | <b>5.88</b> | <b>5.58</b> | <b>3.04</b> |                                |

**Table S4.** BVS calculations for **UOF-Y**.

|             | <b>U1</b>   | <b>U2</b>   | <b>U3</b>   | <b>U4</b>   | <b>U5</b>   | <b>U6</b>   | <b>Y</b>    |                                |
|-------------|-------------|-------------|-------------|-------------|-------------|-------------|-------------|--------------------------------|
| <b>Occ</b>  | <b>1</b>    |                                |
| <b>Sym</b>  | <b>1</b>    | <b>1</b>    | <b>1</b>    | <b>1</b>    | <b>1</b>    | <b>0.5</b>  | <b>1</b>    |                                |
| <b>CN #</b> | <b>6</b>    | <b>7</b>    | <b>7</b>    | <b>7</b>    | <b>7</b>    | <b>6</b>    | <b>8</b>    | <b>Σ</b>                       |
| O1          | 0.76        |             |             | 0.57        | 0.60        |             |             | <b>1.93</b>                    |
| O2          | 0.80        |             | 0.62        | 0.68        |             |             |             | <b>2.10</b>                    |
| O3          | 1.57        |             |             |             |             |             |             | <b>1.57</b>                    |
| O4          | 0.77        |             | 0.64        |             | 0.64        |             |             | <b>2.05</b>                    |
| O5          | 1.25        | 0.55        |             |             |             |             |             | <b>1.80</b>                    |
| O6          |             | 1.76        |             |             |             |             |             | <b>1.76</b>                    |
| O7          |             | 1.66        |             |             |             |             |             | <b>1.66</b>                    |
| O8          |             | 0.43        | 0.55        | 1.10        |             |             |             | <b>2.08</b>                    |
| O9          |             |             | 1.50        |             |             |             |             | <b>1.50</b>                    |
| O10         |             | 0.59        | 0.72        | 0.74        |             |             |             | <b>2.05</b>                    |
| O11         |             | 0.48        |             | 1.37        |             |             |             | <b>1.85</b>                    |
| O12         | 0.70        |             |             | 0.70        | 0.64        |             |             | <b>2.04</b>                    |
| O13         |             |             |             | 0.51        | 0.48        | 0.98        | 0.98        | <b>2.95</b>                    |
| O14         |             |             |             | 1.54        |             |             | 0.51        | <b>2.05</b>                    |
| O15         |             |             |             |             | 1.53        |             | 0.24        | <b>1.78</b>                    |
| O16         |             |             |             |             | 1.47        |             | 0.41        | <b>1.88</b>                    |
| O17         |             |             |             |             | 0.66        | 0.74        |             | <b>1.39</b> (OH)               |
| O18         |             |             | 0.53        |             | 0.57        | 1.03        | 1.03        | <b>2.13</b>                    |
| O19         |             |             |             |             |             | 0.76        | 0.76        | 0.49 <b>1.24</b> (OH)          |
| O20         |             |             |             |             |             |             | 0.42        | <b>0.42</b> (H <sub>2</sub> O) |
| O21         |             |             |             |             |             |             | 0.32        | <b>0.32</b> (H <sub>2</sub> O) |
| O22         |             |             |             |             |             |             | 0.49        | <b>0.49</b> (H <sub>2</sub> O) |
| O23         |             |             |             |             |             |             | 0.47        | <b>0.47</b> (H <sub>2</sub> O) |
| <b>Σ</b>    | <b>5.85</b> | <b>6.02</b> | <b>5.78</b> | <b>6.08</b> | <b>5.93</b> | <b>5.54</b> | <b>3.35</b> |                                |
